# Supplementary material
Source: PubMed Central journal article supplement (PMC3568533)

## Supporting Information

# Cross-linking Mass Spectrometry and Mutagenesis Confirm the Functional Importance of Surface Interactions between CYP3A4 and Holo/Apo Cytochrome *b*<sub>5</sub>

*Chunsheng Zhao*<sup>†</sup>, *Qiuxia Gao*<sup>†</sup>, *Arthur G. Roberts*<sup>‡</sup>, *Scott A. Shaffer*<sup>•</sup>, *Catalin E. Doneanu*<sup>†</sup>,

*Song Xue*<sup>§</sup>, *David R. Goodlett*<sup>†</sup>, *Sidney D. Nelson*<sup>†</sup>, and *William M. Atkins*<sup>†\*</sup>

**FIGURE S1. CO-ferrous binding difference spectra of wild-type CYP3A4 and its mutants.** Spectra were measured in buffer containing 50 mM KPi, 20% glycerol, pH 7.4. Enzyme concentrations in the buffer are as the following: WT: 0.48  $\mu$ M (blue); K96A: 0.36  $\mu$ M (green); K421A: 0.25  $\mu$ M (purple); R446A: 0.47  $\mu$ M (pink); Triple: 0.22  $\mu$ M (gray).

**FIGURE S2. Testosterone binding affinity with CYP3A4 wild-type and mutants.** Binding affinity of testosterone with CYP3A4 wild-type were measured by spectral changes induced by titration of increasing concentrations of testosterone, with equal volumes of vehicle (acetonitrile) added to the reference cuvette each time. The CYP3A4 enzyme was 1  $\mu$ M and the buffer was 50 mM KPi, 20% glycerol, pH 7.4. The  $\Delta A$  is the change of absorbance difference between 390 nm and 418 nm. ■ WT; ▲ K96A; ◆ K421A; ● R446A; □ Triple.

**FIGURE S1.**

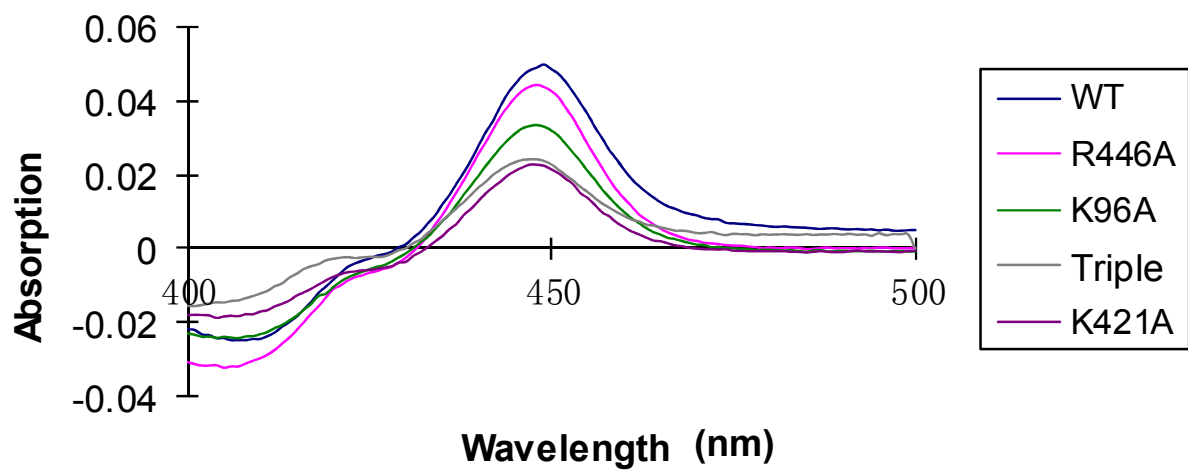

FIGURE S2.

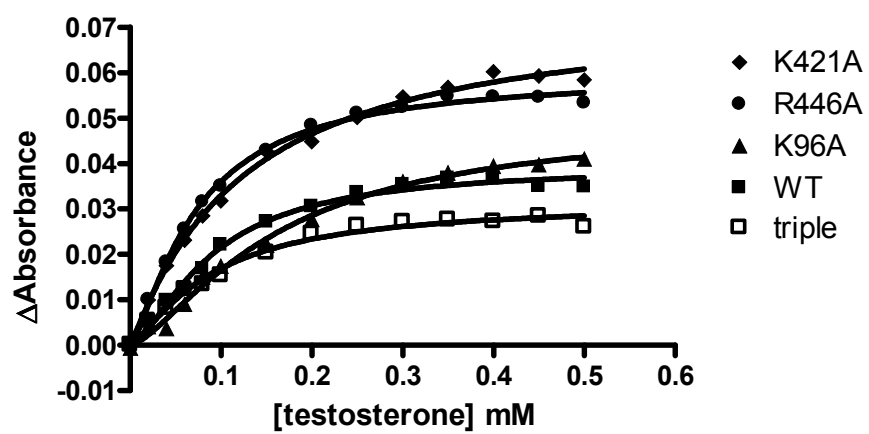

Supplement: NIHMS421655-supplement-1_si_001.pdf [file NIHMS421655-supplement-1_si_001.pdf]
